# Supplementary figures and images for: Unimolecular electronics
Source: Royal Society of Chemistry journal article supplement (doi:10.1039/b802804b), 2008-01-01

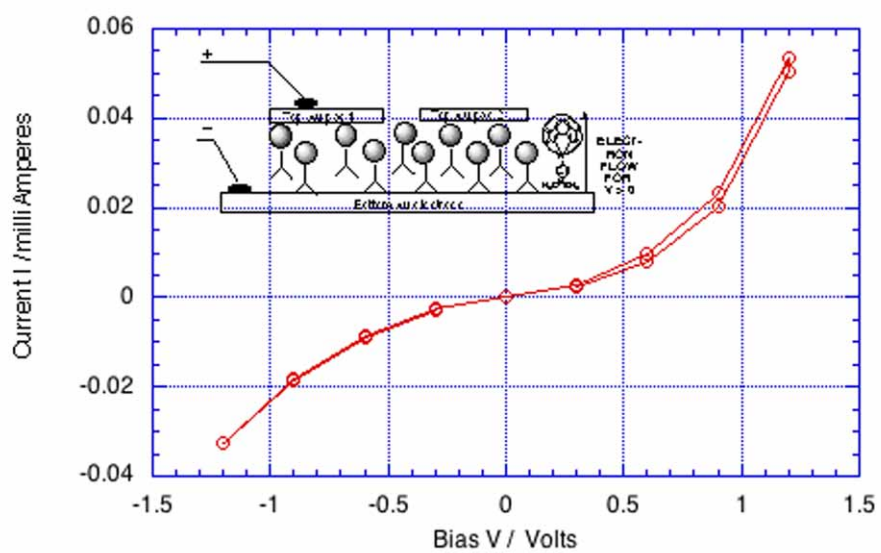

Supplement: b802804b-s1d.pdf [file b802804b-s1d.pdf]

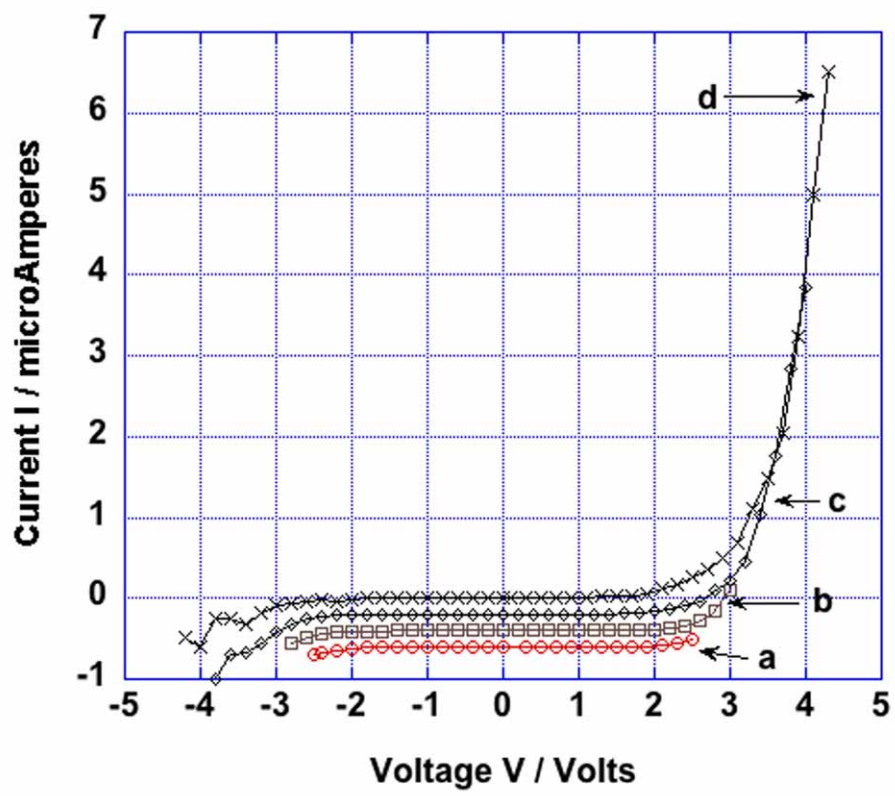

Supplement: b802804b-s1e.pdf [file b802804b-s1e.pdf]
